# Supplementary material for: Using Fidelity Measurement to Assess Quality of Early Psychosis Intervention Services in Ontario
Source: Atypon-hosted journal article supplement (doi:10.1176/appi.ps.201800581), 2019-06-04
Supplement: appi.ps.201800581.ds001.pdf [file appi.ps.201800581.ds001.pdf]

**Fidelity results by program (n=9)**

| Program | Host organization | Total clinical FTEs <sup>1</sup> | Caseload/ clinical FTE | FEPS-FS <sup>2</sup> ratings |            | Item ratings $\geq 4$ (%) |
|---------|-------------------|----------------------------------|------------------------|------------------------------|------------|---------------------------|
|         |                   |                                  |                        | Mean item score <sup>3</sup> | Item range |                           |
| 1       | community         | > 8.0                            | <10                    | 4.4                          | 2 - 5      | 80                        |
| 2       | Hospital          | > 8.0                            | 15-20                  | 4.2                          | 2 - 5      | 80                        |
| 3       | community         | > 8.0                            | <10                    | 4.1                          | 1 - 5      | 77                        |
| 4       | Hospital          | > 8.0                            | <10                    | 4.1                          | 1 - 5      | 80                        |
| 5       | Hospital          | 3.0 - 8.0                        | 15-20                  | 3.9                          | 1 - 5      | 77                        |
| 6       | Hospital          | 3.0 - 8.0                        | 15-20                  | 3.6                          | 1 - 5      | 67                        |
| 7       | community         | 3.0 - 8.0                        | 15-20                  | 3.8                          | 1 - 5      | 60                        |
| 8       | hospital          | < 3.0                            | 10-15                  | 4.1                          | 1 - 5      | 73                        |
| 9       | community         | < 3.0                            | 15-20                  | 3.1                          | 1 - 5      | 47                        |

<sup>1</sup>FTE = full time equivalent

<sup>2</sup> FEPS-FS= First Episode Psychosis Services - Fidelity Scale

<sup>3</sup> sum of individual item ratings/30; items rated on 5 point scale where 5 = fully implemented
